# Supplementary material
Source: PubMed Central journal article supplement (PMC7326588)
Supplement: nqz349_supplemental_file.pdf [file nqz349_supplemental_file.pdf]

**Dietary and Biomarkers of Linoleic Acid and Mortality:  
Systematic Review and Meta-analysis of Prospective Cohort Studies  
Jun Li, et al.  
Online Supplementary Material**

**Dietary and Biomarkers of Linoleic Acid and Mortality: Systematic Review and Meta-analysis of Prospective Cohort Studies**

Jun Li<sup>1,2</sup>, Marta Guasch-Ferré<sup>1,3</sup>, Yanping Li<sup>1</sup>, Frank B. Hu<sup>1,2,3</sup>

Please correspond to Dr. Frank B. Hu ([nhbfh@channing.harvard.edu](mailto:nhbfh@channing.harvard.edu), 655 Huntington Avenue, Building II 3rd Floor, Boston, MA 02115; Phone: +1 617-432-0113).

**Affiliations**

<sup>1</sup> Department of Nutrition, Harvard T.H. Chan School of Public Health, Boston, MA

<sup>2</sup> Department of Epidemiology, Harvard T.H. Chan School of Public Health, Boston, MA

<sup>3</sup> Channing Division of Network Medicine, Department of Medicine, Brigham and Women's Hospital and Harvard Medical School, Boston, MA

**Supplementary information - Search terms**

In the PubMed (fatty acid[MeSH] OR linoleic OR  $\alpha$ -linoleic) AND (death[MeSH] OR mortality[MeSH]) AND (humans[Mesh]) AND (English[lang])

In the Embase "human"/exp AND ('fatty acid'/exp OR 'linoleic acid'/exp OR ' $\alpha$ -linoleic':ab,ti) AND ('mortality'/exp OR death:ab,ti) AND ([embase]/lim OR [medline]/lim) AND [english]/lim

Online Supplementary Material

Supplementary Table 1 Quality of the studies included in the meta-analyses, according to the Newcastle-Ottawa Scale.

| Cohort                                                                    | Study               | Total score | Selection             |                           |                                  |                                     | Comparability        |                           | Outcome                      |                         |                           |
|---------------------------------------------------------------------------|---------------------|-------------|-----------------------|---------------------------|----------------------------------|-------------------------------------|----------------------|---------------------------|------------------------------|-------------------------|---------------------------|
|                                                                           |                     |             | (1)<br>Exposed cohort | (2)<br>Non-exposed cohort | (3)<br>Ascertainment of exposure | (4)<br>Outcome not present at start | (1)<br>Basic factors | (2)<br>Additional factors | (1)<br>Assessment of outcome | (2)<br>Follow-up length | (3)<br>Follow-up adequacy |
| <b>Studies reported dietary LA intake and mortality</b>                   |                     |             |                       |                           |                                  |                                     |                      |                           |                              |                         |                           |
| MRFIT                                                                     | Dolecek 1991 (1)    | 6           | 0                     | 1                         | 1                                | 1                                   | 0                    | 1                         | 1                            | 0                       |                           |
| MRFIT                                                                     | Dolecek 1992 (2)    | 7           | 0                     | 1                         | 1                                | 1                                   | 1                    | 1                         | 1                            | 0                       |                           |
| Italian elderly                                                           | Fortes 2000 (3)     | 5           | 0                     | 1                         | 1                                | 0                                   | 0                    | 1                         | 1                            | 0                       |                           |
| CSPOC-BC patients                                                         | McEligot 2006 (4)   | 7           | 0                     | 1                         | 1                                | 0                                   | 1                    | 1                         | 1                            | 1                       |                           |
| NHS, HPFS                                                                 | Wang 2016 (5)       | 8           | 0                     | 1                         | 1                                | 1                                   | 1                    | 1                         | 1                            | 1                       |                           |
| NHS, HPFS                                                                 | Jiao 2019 (6)       | 7           | 0                     | 1                         | 0                                | 1                                   | 1                    | 1                         | 1                            | 1                       |                           |
| HPFS                                                                      | Richman 2013 (7)    | 7           | 0                     | 1                         | 1                                | 0                                   | 1                    | 1                         | 1                            | 1                       |                           |
| NHS                                                                       | Holmes 1999 (8)     | 7           | 0                     | 1                         | 1                                | 0                                   | 1                    | 1                         | 1                            | 1                       |                           |
| LIBCSP                                                                    | Khankari 2015 (9)   | 6           | 0                     | 1                         | 1                                | 0                                   | 1                    | 0                         | 1                            | 1                       |                           |
| ATBC                                                                      | Pietinen 1997 (10)  | 8           | 0                     | 1                         | 1                                | 1                                   | 1                    | 1                         | 1                            | 1                       |                           |
| IWHS                                                                      | Farvid 2014 (11)    | 8           | 1                     | 1                         | 1                                | 1                                   | 1                    | 1                         | 1                            | 0                       |                           |
| ARIC                                                                      | Farvid 2014 (11)    | 8           | 1                     | 1                         | 1                                | 1                                   | 1                    | 1                         | 1                            | 0                       |                           |
| FMC                                                                       | Farvid 2014 (11)    | 8           | 1                     | 1                         | 1                                | 1                                   | 1                    | 1                         | 1                            | 0                       |                           |
| VIP                                                                       | Farvid 2014 (11)    | 8           | 1                     | 1                         | 1                                | 1                                   | 1                    | 1                         | 1                            | 0                       |                           |
| IHD                                                                       | Farvid 2014 (11)    | 8           | 1                     | 1                         | 1                                | 1                                   | 1                    | 1                         | 1                            | 0                       |                           |
| MDC                                                                       | Farvid 2014 (11)    | 9           | 1                     | 1                         | 1                                | 1                                   | 1                    | 1                         | 1                            | 1                       |                           |
| Canada-BC                                                                 | Goodwin 2003 (12)   | 6           | 0                     | 1                         | 0                                | 0                                   | 1                    | 1                         | 1                            | 1                       |                           |
| NBSS                                                                      | Jain 1994 (13)      | 6           | 0                     | 1                         | 0                                | 0                                   | 1                    | 1                         | 1                            | 1                       |                           |
| AARP-DHS                                                                  | Zhuang 2019a (14)   | 7           | 1                     | 1                         | 0                                | 0                                   | 1                    | 1                         | 1                            | 1                       |                           |
| Örebro-PC                                                                 | Epstein 2012 (15)   | 6           | 0                     | 1                         | 0                                | 0                                   | 1                    | 1                         | 1                            | 1                       |                           |
| CHNS                                                                      | Zhuang 2019b (16)   | 6           | 1                     | 1                         | 0                                | 1                                   | 1                    | 0                         | 1                            | 0                       |                           |
| NHANES                                                                    | Zhuang 2019b (16)   | 8           | 1                     | 1                         | 0                                | 1                                   | 1                    | 1                         | 1                            | 1                       |                           |
| <b>Studies reported dietary intake and biomarkers of LA and mortality</b> |                     |             |                       |                           |                                  |                                     |                      |                           |                              |                         |                           |
| KIHD                                                                      | Laaksonen 2005 (17) | 9           | 1                     | 1                         | 1                                | 1                                   | 1                    | 1                         | 1                            | 1                       |                           |
| InCHIANTI                                                                 | Lelli 2019 (18)     | 8           | 1                     | 1                         | 1                                | 0                                   | 1                    | 1                         | 1                            | 1                       |                           |
| <b>Studies reported biomarkers of LA and mortality</b>                    |                     |             |                       |                           |                                  |                                     |                      |                           |                              |                         |                           |
| KIHD                                                                      | Virtanen 2018 (19)  | 9           | 1                     | 1                         | 1                                | 1                                   | 1                    | 1                         | 1                            | 1                       |                           |
| 60YO                                                                      | Marklund 2015 (20)  | 9           | 1                     | 1                         | 1                                | 1                                   | 1                    | 1                         | 1                            | 1                       |                           |
| 60YO                                                                      | Marklund 2019 (21)  | 9           | 1                     | 1                         | 1                                | 1                                   | 1                    | 1                         | 1                            | 1                       |                           |
| CHS                                                                       | Wu 2014 (22)        | 9           | 1                     | 1                         | 1                                | 1                                   | 1                    | 1                         | 1                            | 1                       |                           |
| CHS                                                                       | Marklund 2019 (21)  | 9           | 1                     | 1                         | 1                                | 1                                   | 1                    | 1                         | 1                            | 1                       |                           |
| MP-1 & MP-2                                                               | de Goede 2013 (23)  | 9           | 1                     | 1                         | 1                                | 1                                   | 1                    | 1                         | 1                            | 1                       |                           |
| EUROASPIRE                                                                | Erkkila 2003 (24)   | 6           | 0                     | 1                         | 1                                | 0                                   | 1                    | 1                         | 1                            | 0                       |                           |
| ULSAM-50                                                                  | Warensjö 2008 (25)  | 8           | 1                     | 1                         | 1                                | 0                                   | 1                    | 1                         | 1                            | 1                       |                           |
| ULSAM-50                                                                  | Kilander 2001 (26)  | 7           | 1                     | 1                         | 1                                | 0                                   | 1                    | 0                         | 1                            | 1                       |                           |
| ULSAM-70                                                                  | Iggman 2016 (27)    | 8           | 1                     | 1                         | 1                                | 0                                   | 1                    | 1                         | 1                            | 1                       |                           |
| TRIUMP                                                                    | Harris 2013 (28)    | 5           | 0                     | 1                         | 1                                | 0                                   | 1                    | 0                         | 1                            | 0                       |                           |
| WHIMS                                                                     | Harris 2017 (29)    | 7           | 0                     | 1                         | 1                                | 0                                   | 1                    | 1                         | 1                            | 1                       |                           |

### Online Supplementary Material

|                           |                     |   |   |   |   |   |   |   |   |   |   |
|---------------------------|---------------------|---|---|---|---|---|---|---|---|---|---|
| Swedish dialysis patients | Huang 2012 (30)     | 5 | 0 | 1 | 1 | 0 | 1 | 0 | 1 | 0 | 1 |
| HSS                       | Pottala 2010 (31)   | 5 | 0 | 1 | 1 | 0 | 0 | 0 | 1 | 1 | 1 |
| LURIC                     | Delgado 2017 (32)   | 7 | 0 | 1 | 1 | 0 | 1 | 1 | 1 | 1 | 1 |
| Norway old patients       | Lindberg 2008 (33)  | 7 | 0 | 1 | 1 | 0 | 1 | 1 | 1 | 1 | 1 |
| NSCS                      | Miura 2016 (34)     | 7 | 1 | 1 | 1 | 0 | 1 | 1 | 1 | 1 | 0 |
| FHS                       | Harris 2018 (35)    | 8 | 1 | 1 | 1 | 1 | 1 | 1 | 1 | 1 | 0 |
| 3C <sup>1</sup>           | Satizabal 2018 (36) | 7 | 1 | 1 | 1 | 0 | 1 | 1 | 1 | 1 | 0 |
| EPIC-Norfolk              | Marklund 2019 (21)  | 8 | 1 | 1 | 1 | 1 | 1 | 1 | 1 | 1 | 0 |
| MCCS                      | Marklund 2019 (21)  | 8 | 1 | 1 | 1 | 1 | 1 | 1 | 1 | 1 | 0 |
| MESA                      | Marklund 2019 (21)  | 9 | 1 | 1 | 1 | 1 | 1 | 1 | 1 | 1 | 1 |
| CCCC                      | Marklund 2019 (21)  | 7 | 0 | 1 | 1 | 1 | 1 | 1 | 1 | 1 | 0 |
| SHHEC                     | Marklund 2019 (21)  | 8 | 1 | 1 | 1 | 1 | 1 | 1 | 1 | 1 | 0 |
| ARIC                      | Marklund 2019 (21)  | 8 | 1 | 1 | 1 | 1 | 1 | 1 | 1 | 1 | 0 |
| AGES                      | Marklund 2019 (21)  | 7 | 0 | 1 | 1 | 1 | 1 | 1 | 1 | 1 | 0 |
| HS                        | Marklund 2019 (21)  | 8 | 1 | 1 | 1 | 1 | 1 | 1 | 1 | 1 | 0 |
| PPSII                     | Zureik 1995 (37)    | 7 | 0 | 1 | 1 | 0 | 1 | 1 | 1 | 1 | 1 |
| MRFIT                     | Simon 1998 (38)     | 7 | 0 | 1 | 1 | 1 | 1 | 1 | 1 | 1 | 0 |

**Scoring criteria:** Selection-(1), representativeness of the exposed cohort: if the study truly or somewhat representative of the average of a population in the community then score 1; selection-(2), if the non-exposed cohort was drawn from the same community as the exposed cohort then score 1; selection-(3), if the exposure is ascertained from secure record or structured interview then score 1; selection-(4), if the authors demonstrated that outcome of interest (in this case, prevalent of CVD for CVD mortality, or prevalent cancer for cancer mortality) was not present at the start of the study, then score 1. Comparability-(1), if the study is age and gender adjusted, then score 1; comparability-(2), if the study further adjusted for BMI, smoking, alcohol intake, disease-related risk factors (for populations at high risk for certain disease), and energy intake and other dietary factors (dietary linoleic acid intake as exposure), then score 1. Outcome-(1), if the outcome is assessed based on independent blind adjudication or record linkage, then score 1; outcome-(2), if the follow-up time  $\geq 5$  years for general populations and  $\geq 2$  years for populations with existing diseases, then score 1; outcome-(3), if it is stated in the paper that the follow-up is complete for all subjects or follow-up rate is  $\geq 90\%$  for included participants, then score 1. Note for <sup>1</sup>: this study investigated both the FHS and 3C study; because data from FHS has been reported in detail in other publications, in this study we only evaluated data for the 3C study.

Online Supplementary Material

Supplementary Table 2 Stratified meta-analysis for dietary linoleic acid intake in relation to mortality from all-causes, CVD, and cancer.

| Strata                       | All-cause mortality     |                |                    |                      |                                    | CVD mortality           |                |                    |                      |                                    | Cancer mortality        |                |                    |                      |                                    |
|------------------------------|-------------------------|----------------|--------------------|----------------------|------------------------------------|-------------------------|----------------|--------------------|----------------------|------------------------------------|-------------------------|----------------|--------------------|----------------------|------------------------------------|
|                              | RR (95%CI) <sup>1</sup> | P <sup>2</sup> | P-het <sup>3</sup> | Study N <sup>4</sup> | P <sub>meta-reg</sub> <sup>5</sup> | RR (95%CI) <sup>1</sup> | P <sup>2</sup> | P-het <sup>3</sup> | Study N <sup>4</sup> | P <sub>meta-reg</sub> <sup>5</sup> | RR (95%CI) <sup>1</sup> | P <sup>2</sup> | P-het <sup>3</sup> | Study N <sup>4</sup> | P <sub>meta-reg</sub> <sup>5</sup> |
| <b>Baseline Population #</b> |                         |                |                    |                      |                                    |                         |                |                    |                      |                                    |                         |                |                    |                      |                                    |
| General population           | 0.85 (0.80, 0.90)       | <0.001         | 0.02               | 8                    | [ref]                              | 0.86 (0.80, 0.92)       | <0.001         | 0.34               | 14                   | [ref]                              | 0.88 (0.85, 0.92)       | <0.001         | 0.58               | 4                    | [ref]                              |
| CVD/high risk for CVD        | 0.82 (0.72, 0.94)       | 0.003          | 0.80               | 2 <sup>6</sup>       | 0.77                               | 0.79 (0.63, 0.99)       | 0.04           | 0.59               | 2 <sup>6</sup>       | 0.62                               | 1.02 (0.78, 1.34)       | 0.86           | 0.84               | 2 <sup>5</sup>       | 0.32                               |
| Cancer                       | 1.15 (0.82, 1.62)       | 0.41           | 0.02               | 4 <sup>6</sup>       | 0.11                               | -                       | -              | -                  | -                    | -                                  | 0.98 (0.76, 1.26)       | 0.86           | 0.55               | 4                    | 0.46                               |
| <b>Study location</b>        |                         |                |                    |                      |                                    |                         |                |                    |                      |                                    |                         |                |                    |                      |                                    |
| North American               | 0.87 (0.81, 0.93)       | <0.001         | 0.002              | 7                    | [ref]                              | 0.84 (0.77, 0.93)       | <0.001         | 0.12               | 7                    | [ref]                              | 0.89 (0.85, 0.93)       | <0.001         | 0.62               | 8                    | [ref]                              |
| European                     | 0.72 (0.54, 0.95)       | 0.02           | 0.25               | 3                    | 0.38                               | 0.86 (0.71, 1.04)       | 0.11           | 0.64               | 7                    | 0.94                               | 0.91 (0.63, 1.32)       | 0.62           | -                  | 1                    | 0.90                               |
| Asian                        | 1.16 (0.91, 1.48)       | 0.24           | -                  | 1                    | 0.18                               | 0.87 (0.82, 0.92)       | 0.91           | -                  | 1                    | 0.64                               | -                       | -              | -                  | 0                    | -                                  |
| <b>NOS score</b>             |                         |                |                    |                      |                                    |                         |                |                    |                      |                                    |                         |                |                    |                      |                                    |
| <8                           | 1.02 (0.82, 1.27)       | 0.88           | 0.001              | 6                    | [ref]                              | 0.92 (0.87, 0.97)       | 0.004          | 0.67               | 2                    | [ref]                              | 0.88 (0.83, 0.92)       | <0.001         | 0.60               | 6                    | [ref]                              |
| ≥8                           | 0.82 (0.79, 0.86)       | <0.001         | 0.56               | 5                    | 0.07                               | 0.80 (0.74, 0.87)       | <0.001         | 0.83               | 13                   | 0.17                               | 0.91 (0.85, 0.98)       | 0.01           | 0.62               | 3                    | 0.91                               |
| <b>Dietary assessment</b>    |                         |                |                    |                      |                                    |                         |                |                    |                      |                                    |                         |                |                    |                      |                                    |
| Baseline EEQ/record          | 0.94 (0.80, 1.11)       | 0.45           | 0.001              | 8                    | [ref]                              | 0.91 (0.86, 0.97)       | 0.001          | 0.89               | 12                   | [ref]                              | 0.87 (0.83, 0.92)       | <0.001         | 0.71               | 6                    | [ref]                              |
| Repeated FFQ/record          | 0.83 (0.79, 0.86)       | <0.001         | 0.60               | 3                    | 0.42                               | 0.78 (0.72, 0.86)       | <0.001         | 0.65               | 3                    | <b>0.02</b>                        | 0.92 (0.85, 0.99)       | 0.03           | 0.52               | 3                    | 0.32                               |
| <b>Age</b>                   |                         |                |                    |                      |                                    |                         |                |                    |                      |                                    |                         |                |                    |                      |                                    |
| <60 years                    | 0.87 (0.79, 0.96)       | 0.006          | 0.008              | 7                    | [ref]                              | 0.80 (0.74, 0.87)       | <0.001         | 0.85               | 12                   | [ref]                              | 0.92 (0.86, 0.99)       | 0.02           | 0.70               | 7                    | [ref]                              |
| ≥60 years                    | 0.94 (0.66, 1.35)       | 0.75           | 0.02               | 4                    | 0.83                               | 0.92 (0.87, 0.98)       | 0.006          | 0.90               | 3                    | <b>0.01</b>                        | 0.87 (0.83, 0.92)       | <0.001         | 0.82               | 2                    | 0.26                               |
| <b>Gender</b>                |                         |                |                    |                      |                                    |                         |                |                    |                      |                                    |                         |                |                    |                      |                                    |
| Male%<50                     | 0.98 (0.81, 1.19)       | 0.83           | 0.001              | 7                    | [ref]                              | 0.84 (0.76, 0.94)       | 0.002          | 0.94               | 6                    | [ref]                              | 0.90 (0.82, 0.98)       | 0.02           | 0.62               | 5                    | [ref]                              |
| Male%≥50                     | 0.83 (0.76, 0.91)       | <0.001         | 0.04               | 4                    | 0.17                               | 0.83 (0.73, 0.95)       | 0.006          | 0.13               | 9                    | 0.53                               | 0.88 (0.84, 0.93)       | <0.001         | 0.46               | 4                    | 0.67                               |
| <b>Follow-up period</b>      |                         |                |                    |                      |                                    |                         |                |                    |                      |                                    |                         |                |                    |                      |                                    |
| <10 years                    | 0.93 (0.62, 1.39)       | 0.73           | 0.02               | 4                    | [ref]                              | 0.91 (0.69, 1.20)       | 0.49           | 0.78               | 4                    | [ref]                              | 0.86 (0.66, 1.11)       | 0.25           | 0.97               | 3                    | [ref]                              |
| ≥10 years                    | 0.87 (0.81, 0.94)       | <0.001         | 0.002              | 7                    | 0.96                               | 0.84 (0.78, 0.92)       | <0.001         | 0.20               | 11                   | 0.64                               | 0.89 (0.85, 0.93)       | <0.001         | 0.39               | 6                    | 0.78                               |

<sup>1</sup> Relative risks (RRs) and 95% confidence intervals (CIs) from an inverse variance-weighted random-effects meta-analysis.

<sup>2</sup> P values for the association between linoleic acid intake and mortality.

<sup>3</sup> P values for the heterogeneity test from the random-effects meta-analysis within each subgroup.

<sup>4</sup> Studies that were input as 2 records, mostly due to separated data records for man and women, were counts as 2 studies in this table.

<sup>5</sup> The potential modification effect of the stratification factor (i.e., test of difference between subgroups) was examined using univariate meta-regression, with log RRs as dependent variable, and each stratification factors as independent variable.

<sup>6</sup> Three additional papers (Holmes, 1999; Richman, 2013; and Jiao, 2019) that did not include in the main analysis (because they were conducted in subsamples of individuals with cancers while results in the whole cohorts were reported in Wang, 2016) were included in the stratification analysis.

NOS: Newcastle-Ottawa Scale.

Online Supplementary Material

Supplementary Table 3 Stratified meta-analysis for biomarkers of linoleic acid in relation to mortality from all-causes, CVD, and cancer.

| Strata                     | All-cause mortality     |                |                    |         |                                    | CVD mortality           |                |                    |         |                                    | Cancer mortality        |                |                    |                      |                                    |
|----------------------------|-------------------------|----------------|--------------------|---------|------------------------------------|-------------------------|----------------|--------------------|---------|------------------------------------|-------------------------|----------------|--------------------|----------------------|------------------------------------|
|                            | RR (95%CI) <sup>1</sup> | P <sup>2</sup> | P-het <sup>3</sup> | Study N | P <sub>meta-reg</sub> <sup>4</sup> | RR (95%CI) <sup>1</sup> | P <sup>2</sup> | P-het <sup>3</sup> | Study N | P <sub>meta-reg</sub> <sup>4</sup> | RR (95%CI) <sup>1</sup> | P <sup>2</sup> | P-het <sup>3</sup> | Study N <sup>5</sup> | P <sub>meta-reg</sub> <sup>4</sup> |
| <b>Tissue types</b>        |                         |                |                    |         |                                    |                         |                |                    |         |                                    |                         |                |                    |                      |                                    |
| Adipose tissue             | 0.90 (0.82, 0.98)       | 0.02           | -                  | 1       | [ref]                              | 0.83 (0.67, 1.04)       | 0.11           | 0.09               | 2       | [ref]                              | -                       | -              | -                  | 0                    | -                                  |
| Erythrocytes               | 0.96 (0.92, 1.00)       | 0.05           | 0.28               | 4       | 0.48                               | 0.94 (0.89, 1.00)       | 0.06           | 0.87               | 3       | 0.20                               | 0.94 (0.84, 1.05)       | 0.28           | 0.97               | 2                    | [ref]                              |
| Cholesteryl esters         | 0.84 (0.75, 0.95)       | 0.004          | 0.06               | 4       | 0.47                               | 0.86 (0.80, 0.94)       | <0.001         | 0.41               | 5       | 0.99                               | 0.82 (0.60, 1.13)       | 0.22           | 0.03               | 3                    | 0.46                               |
| Whole blood                | 1.28 (0.79, 2.07)       | 0.32           | -                  | 1       | 0.23                               | -                       | -              | -                  | 0       | -                                  | -                       | -              | -                  | 0                    | -                                  |
| Phospholipids              | 0.93 (0.84, 1.04)       | 0.20           | 0.15               | 5       | 0.66                               | 0.94 (0.87, 1.01)       | 0.08           | 0.72               | 6       | 0.26                               | 0.96 (0.85, 1.08)       | 0.49           | 0.44               | 2                    | 0.87                               |
| Total serum or plasma      | 0.86 (0.76, 0.97)       | 0.01           | 0.18               | 3       | 0.56                               | 0.78 (0.67, 0.91)       | 0.002          | 0.21               | 4       | 0.32                               | 0.90 (0.78, 1.03)       | 0.14           | -                  | 1                    | 0.75                               |
| <b>Baseline conditions</b> |                         |                |                    |         |                                    |                         |                |                    |         |                                    |                         |                |                    |                      |                                    |
| General population         | 0.89 (0.84, 0.94)       | <0.001         | 0.005              | 11      | [ref]                              | 0.87 (0.83, 0.92)       | <0.001         | 0.20               | 17      | [ref]                              | 0.88 (0.79, 0.97)       | 0.01           | 0.19               | 5                    | [ref]                              |
| CVD/high risk for CVD      | 0.93 (0.88, 0.98)       | 0.006          | 0.41               | 4       | 0.34                               | 0.95 (0.80, 1.14)       | 0.61           | 0.29               | 2       | 0.29                               | 1.05 (0.81, 1.36)       | 0.71           | -                  | 1                    | 0.37                               |
| Other disease conditions   | 0.95 (0.80, 1.13)       | 0.56           | 0.08               | 3       | 0.21                               | 0.96 (0.88, 1.05)       | 0.37           | -                  | 1       | 0.20                               | 0.94 (0.83, 1.07)       | 0.34           | -                  | 1                    | 0.54                               |
| <b>Study location</b>      |                         |                |                    |         |                                    |                         |                |                    |         |                                    |                         |                |                    |                      |                                    |
| North American             | 0.97 (0.94, 1.01)       | 0.10           | 0.66               | 5       | [ref]                              | 0.92 (0.82, 1.04)       | 0.19           | 0.06               | 6       | [ref]                              | 0.95 (0.87, 1.03)       | 0.21           | 0.88               | 4                    | [ref]                              |
| European                   | 0.88 (0.83, 0.92)       | <0.001         | 0.02               | 13      | <b>0.02</b>                        | 0.88 (0.84, 0.92)       | <0.001         | 0.42               | 13      | 0.15                               | 0.83 (0.69, 0.99)       | 0.03           | 0.10               | 3                    | 0.17                               |
| Asian                      | -                       | -              | -                  | -       | -                                  | 0.86 (0.57, 1.31)       | 0.48           | -                  | 1       | 0.71                               | -                       | -              | -                  | 0                    | -                                  |
| <b>NOS score</b>           |                         |                |                    |         |                                    |                         |                |                    |         |                                    |                         |                |                    |                      |                                    |
| <8                         | 0.95 (0.90, 1.00)       | 0.05           | 0.16               | 10      | [ref]                              | 0.89 (0.79, 1.01)       | 0.07           | 0.03               | 5       | [ref]                              | 0.88 (0.75, 1.04)       | 0.14           | 0.05               | 4                    | [ref]                              |
| ≥8                         | 0.88 (0.83, 0.94)       | <0.001         | 0.002              | 8       | 0.18                               | 0.88 (0.84, 0.92)       | <0.001         | 0.44               | 15      | 0.23                               | 0.92 (0.84, 1.01)       | 0.07           | 0.92               | 3                    | 0.76                               |
| <b>Study Design</b>        |                         |                |                    |         |                                    |                         |                |                    |         |                                    |                         |                |                    |                      |                                    |
| Cohort analysis            | 0.91 (0.87, 0.95)       | <0.001         | <0.001             | 18      | -                                  | 0.89 (0.85, 0.94)       | <0.001         | 0.07               | 18      | [ref]                              | 0.89 (0.83, 0.97)       | 0.006          | 0.24               | 6                    | [ref]                              |
| Nested case-control        | -                       | -              | -                  | -       | -                                  | 0.94 (0.77, 1.15)       | 0.55           | 0.55               | 2       | 0.66                               | 1.05 (0.81, 1.36)       | 0.71           | -                  | 1                    | 0.37                               |
| <b>Age</b>                 |                         |                |                    |         |                                    |                         |                |                    |         |                                    |                         |                |                    |                      |                                    |
| <60 years                  | 0.85 (0.79, 0.91)       | <0.001         | 0.16               | 5       | [ref]                              | 0.84 (0.79, 0.89)       | <0.001         | 0.55               | 6       | [ref]                              | 0.87 (0.74, 1.02)       | 0.09           | 0.07               | 4                    | [ref]                              |
| ≥60 years                  | 0.93 (0.89, 0.98)       | 0.003          | 0.02               | 13      | 0.07                               | 0.92 (0.88, 0.97)       | 0.002          | 0.30               | 14      | <b>0.02</b>                        | 0.94 (0.86, 1.02)       | 0.14           | 1.00               | 3                    | 0.40                               |
| <b>Sex</b>                 |                         |                |                    |         |                                    |                         |                |                    |         |                                    |                         |                |                    |                      |                                    |
| Male%<50                   | 0.97 (0.94, 1.01)       | 0.14           | 0.88               | 8       | [ref]                              | 0.94 (0.89, 0.99)       | 0.02           | 0.83               | 11      | [ref]                              | 0.94 (0.86, 1.02)       | 0.14           | 1.00               | 3                    | [ref]                              |
| Male%≥50                   | 0.86 (0.81, 0.92)       | <0.001         | 0.006              | 10      | <b>0.008</b>                       | 0.86 (0.79, 0.93)       | <0.001         | 0.03               | 9       | 0.08                               | 0.87 (0.74, 1.02)       | 0.09           | 0.07               | 4                    | 0.41                               |
| <b>Follow-up period</b>    |                         |                |                    |         |                                    |                         |                |                    |         |                                    |                         |                |                    |                      |                                    |
| <10 years                  | 0.95 (0.91, 0.99)       | 0.03           | 0.55               | 9       | [ref]                              | 0.92 (0.79, 1.07)       | 0.28           | 0.84               | 5       | [ref]                              | 0.91 (0.76, 1.10)       | 0.33           | 0.11               | 4                    | [ref]                              |
| ≥10 years                  | 0.89 (0.83, 0.95)       | <0.001         | <0.001             | 9       | 0.14                               | 0.89 (0.84, 0.94)       | <0.001         | 0.03               | 15      | 0.17                               | 0.89 (0.83, 0.96)       | 0.004          | 0.43               | 3                    | 0.43                               |

<sup>1</sup> Relative risks (RRs) and 95% confidence intervals (CIs) from an inverse variance-weighted random-effects meta-analysis.

<sup>2</sup> P values for the association between linoleic acid intake and mortality.

<sup>3</sup> P values for the heterogeneity test from the random-effects meta-analysis.

<sup>4</sup> The potential modification effect of the stratification factor (i.e., test of difference between subgroups) was examined using univariate meta-regression, with log RRs as dependent variable, and each stratification factors as independent variable.

<sup>5</sup> The MRFIT study (Simon, 1998) provided data of LA in phospholipid and cholesteryl ester for the same population. We used both data for meta-analysis by tissue types but chose to use LA in phospholipid in the overall meta-analysis.

NOS: Newcastle-Ottawa Scale.

Online Supplementary Material

**Supplement Figure 1 Meta-analysis of dietary linoleic acid intake and total mortality in prospective cohorts, after excluding one study at a time.** Relative risks (RRs) correspond to comparison between extreme categories. RRs from different studies were pooled using an inverse variance-weighted random-effects meta-analysis. Squares denote the weight of the excluded studies in the meta-analysis.

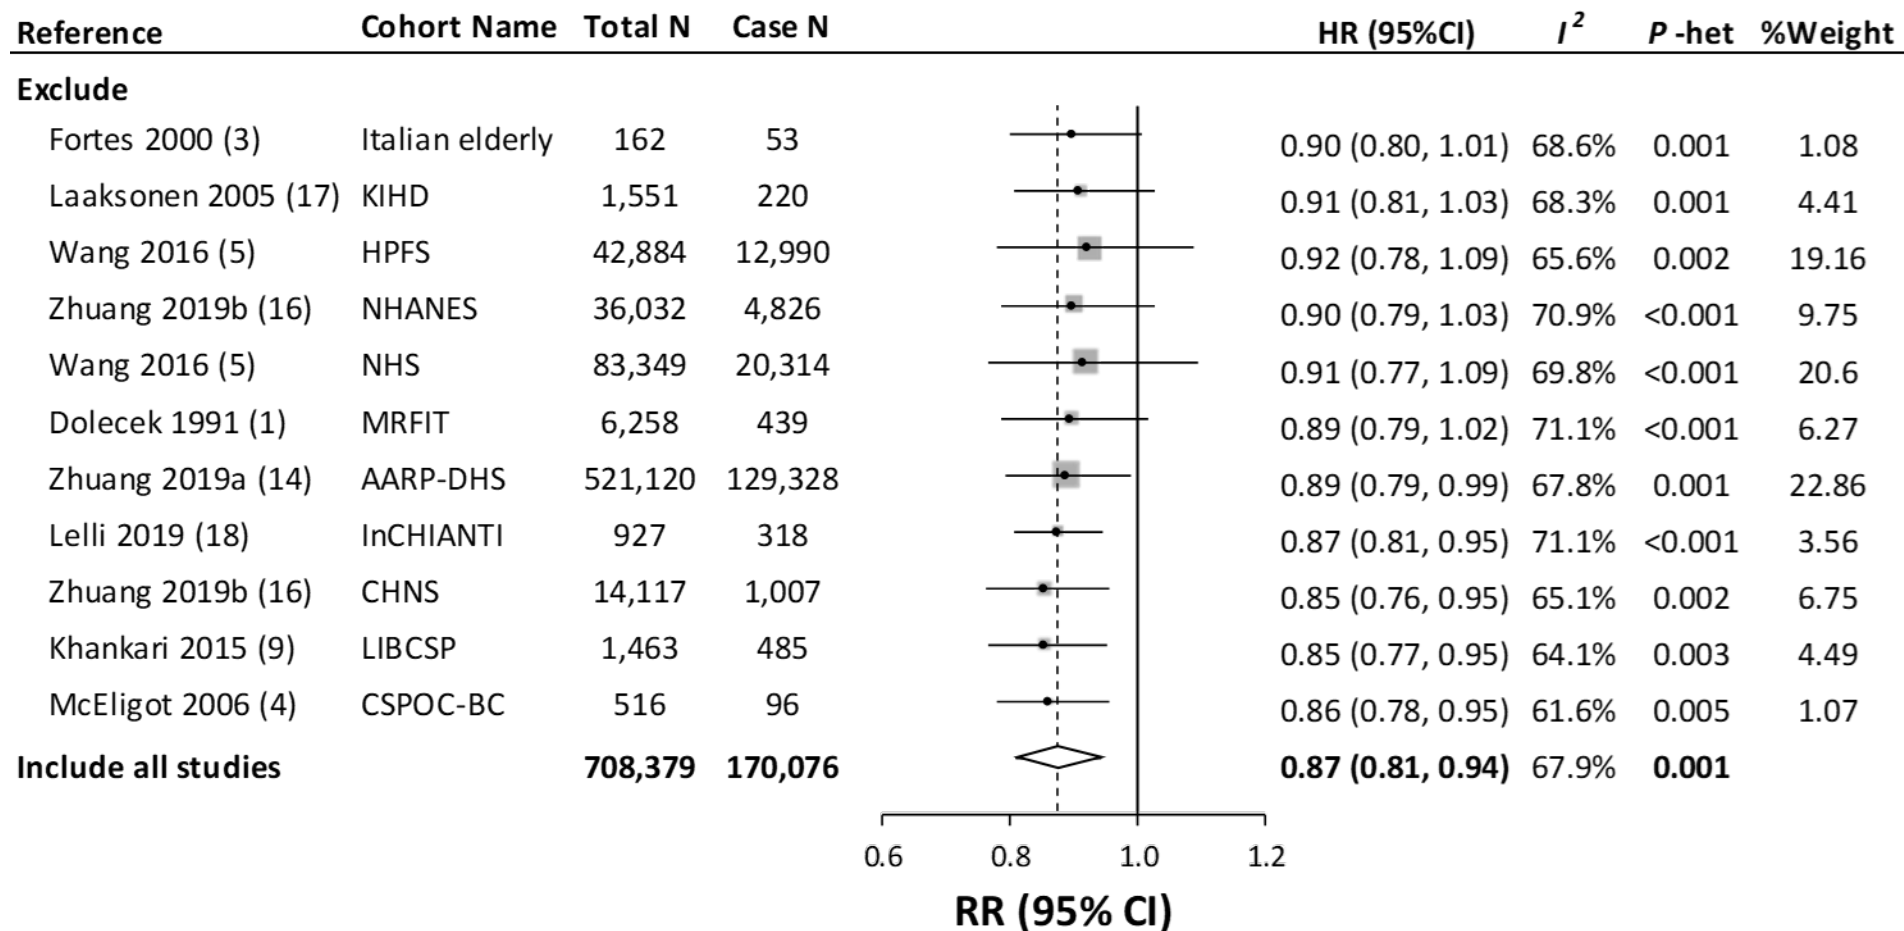

**Supplement Figure 2 Meta-analysis of the association between LA biomarkers and mortality from all-causes (A), CVD (B), and cancer (C).** Relative risks (RRs) were for each standard deviation increment in linoleic acid biomarkers. The area of each blue square is proportional to the weight of the study, which is the inverse of the variance of the log RRs. Dots and horizontal lines represent RRs and 95% confidence interval (CI). Diamonds depict pooled estimates from a random-effects inverse variance-weighted meta-analysis. Abbreviations: 3C: the Three-City study; 60YO: Stockholm old men and women; AGES-Reykjavik: Age, gene/environment susceptibility – Reykjavik Study; ARIC: Atherosclerosis Risk in Communities; CCCC: Chin-Shan Community Cardiovascular Cohort Study; CHS: Cardiovascular Health Study; CVD: Cardiovascular disease; CVD: Cardiovascular disease; DIA Patient: A small cohort of dialysis patients in Sweden; EPIC: European Prospective Investigation of Cancer; EUROASPIRE-Finnish: European Action on Secondary and Primary Prevention by Intervention to Reduce Events – Finnish; Framingham: Framingham Heart Study; HS: Hisayama Study; HSS: The Heart and Soul Study; InCHIANTI, the longitudinal InCHIANTI study; KIID: Kuopio Ischemic Heart Disease Risk Factor Study; LA: Linoleic acid; LURIC: The Ludwigshafen Risk and Cardiovascular Health study; MCCC: Melbourne Collaborative Cohort Study; MESA: Multi-Ethnic Study of Atherosclerosis; MP-1 & 2: Monitoring Project on Cardiovascular Disease Risk Factors; MRFIT: The Multiple Risk Factor Intervention Trial.; NSCS: The Nambour Skin Cancer Study; Old patients: A small cohort of old patients, frail, old patients in Norway; PPSII: Paris prospective study II; SHHEC: Scottish Heart Health Extended Cohort; TRIUMPH: The Translational Research Investigating Underlying disparities in acute Myocardial Infarction Patients' Health status study; ULSAM 50: Uppsala Longitudinal Study of Adult Men investigations, recruitment at 50 years old; ULSAM 70: Uppsala Longitudinal Study of Adult Men investigations, recruitment at 70 years old; WHIMS: Women's Health Initiative Memory Study.



## A All-cause mortality

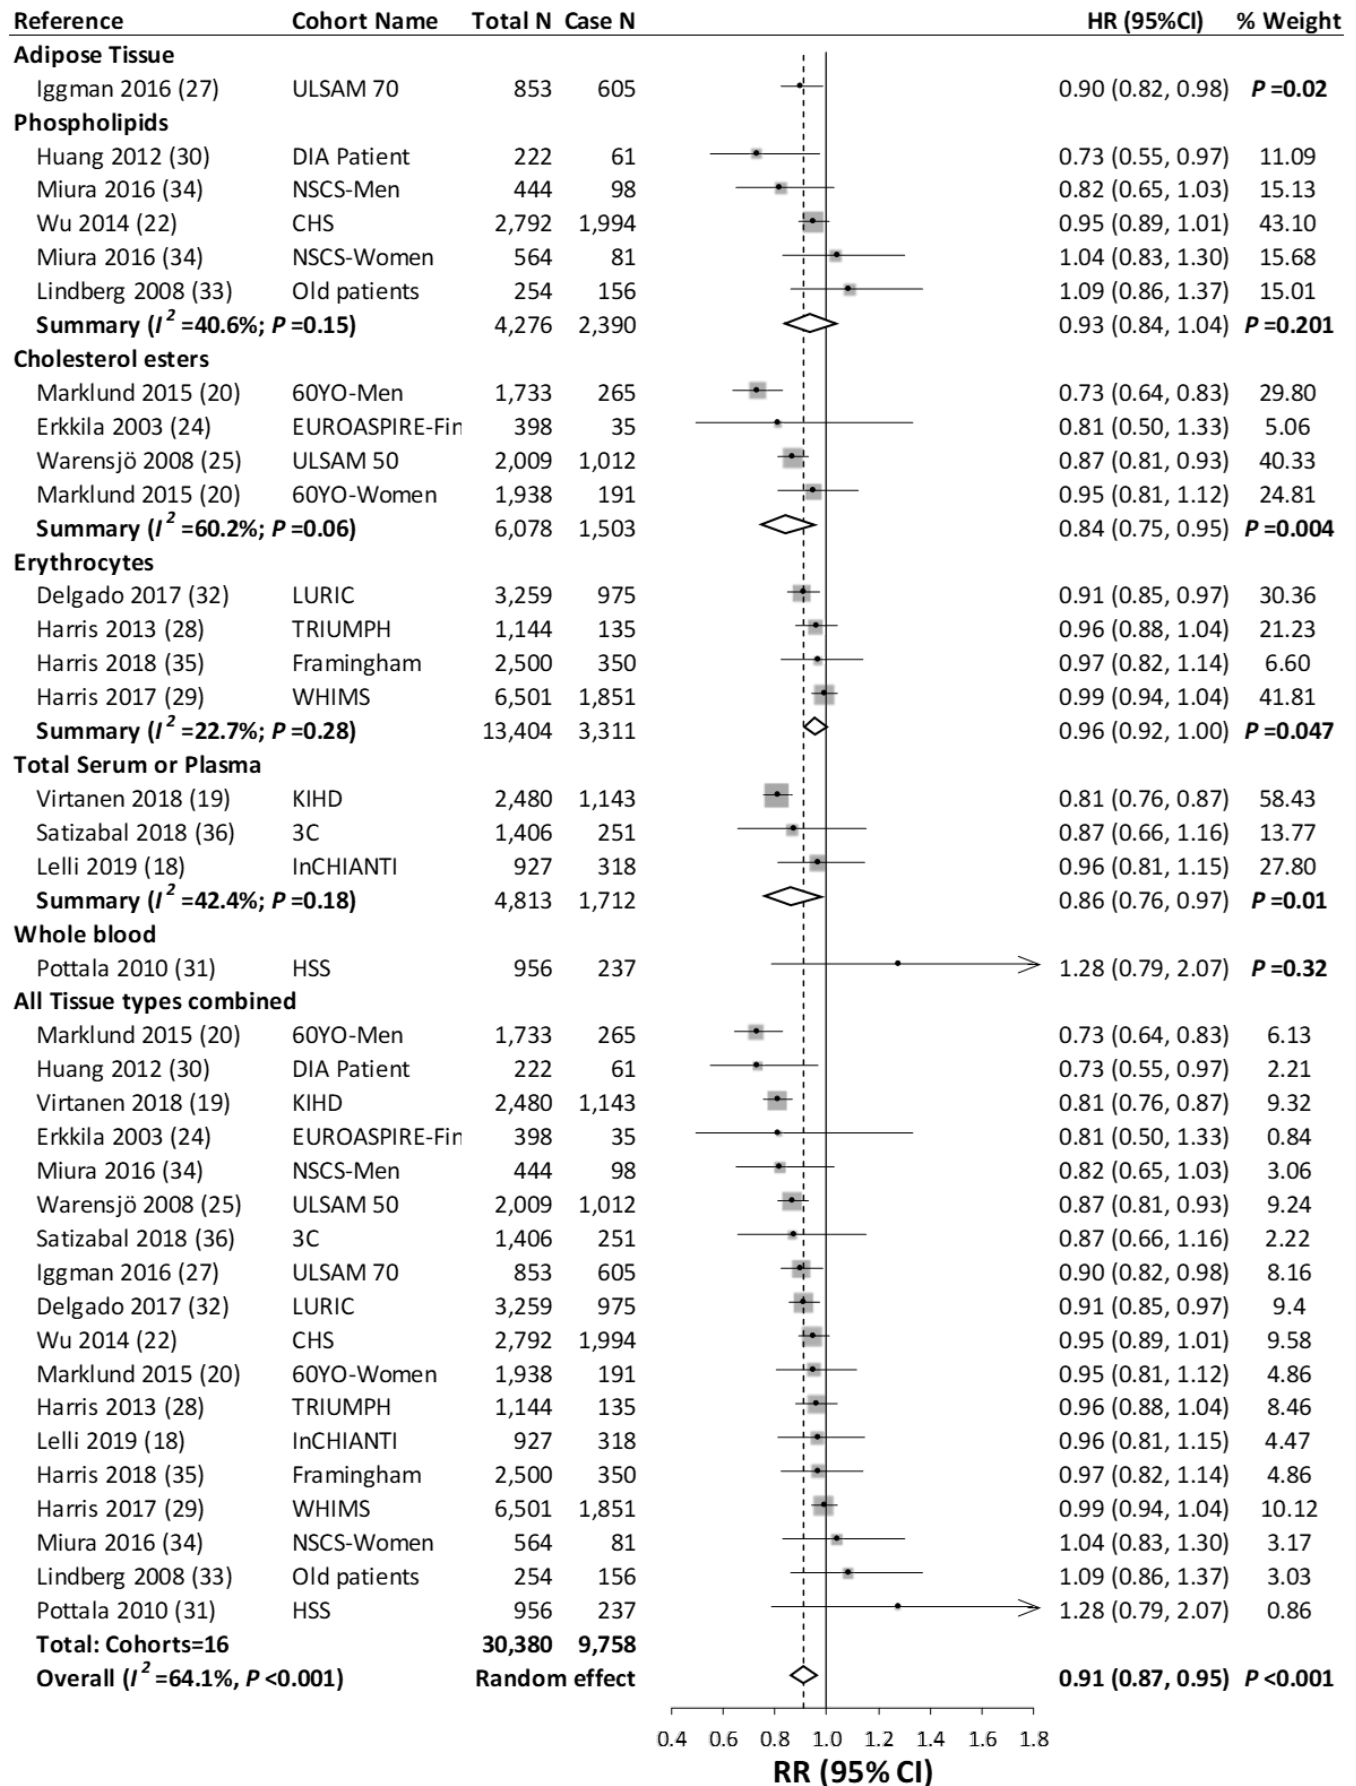

## B CVD mortality

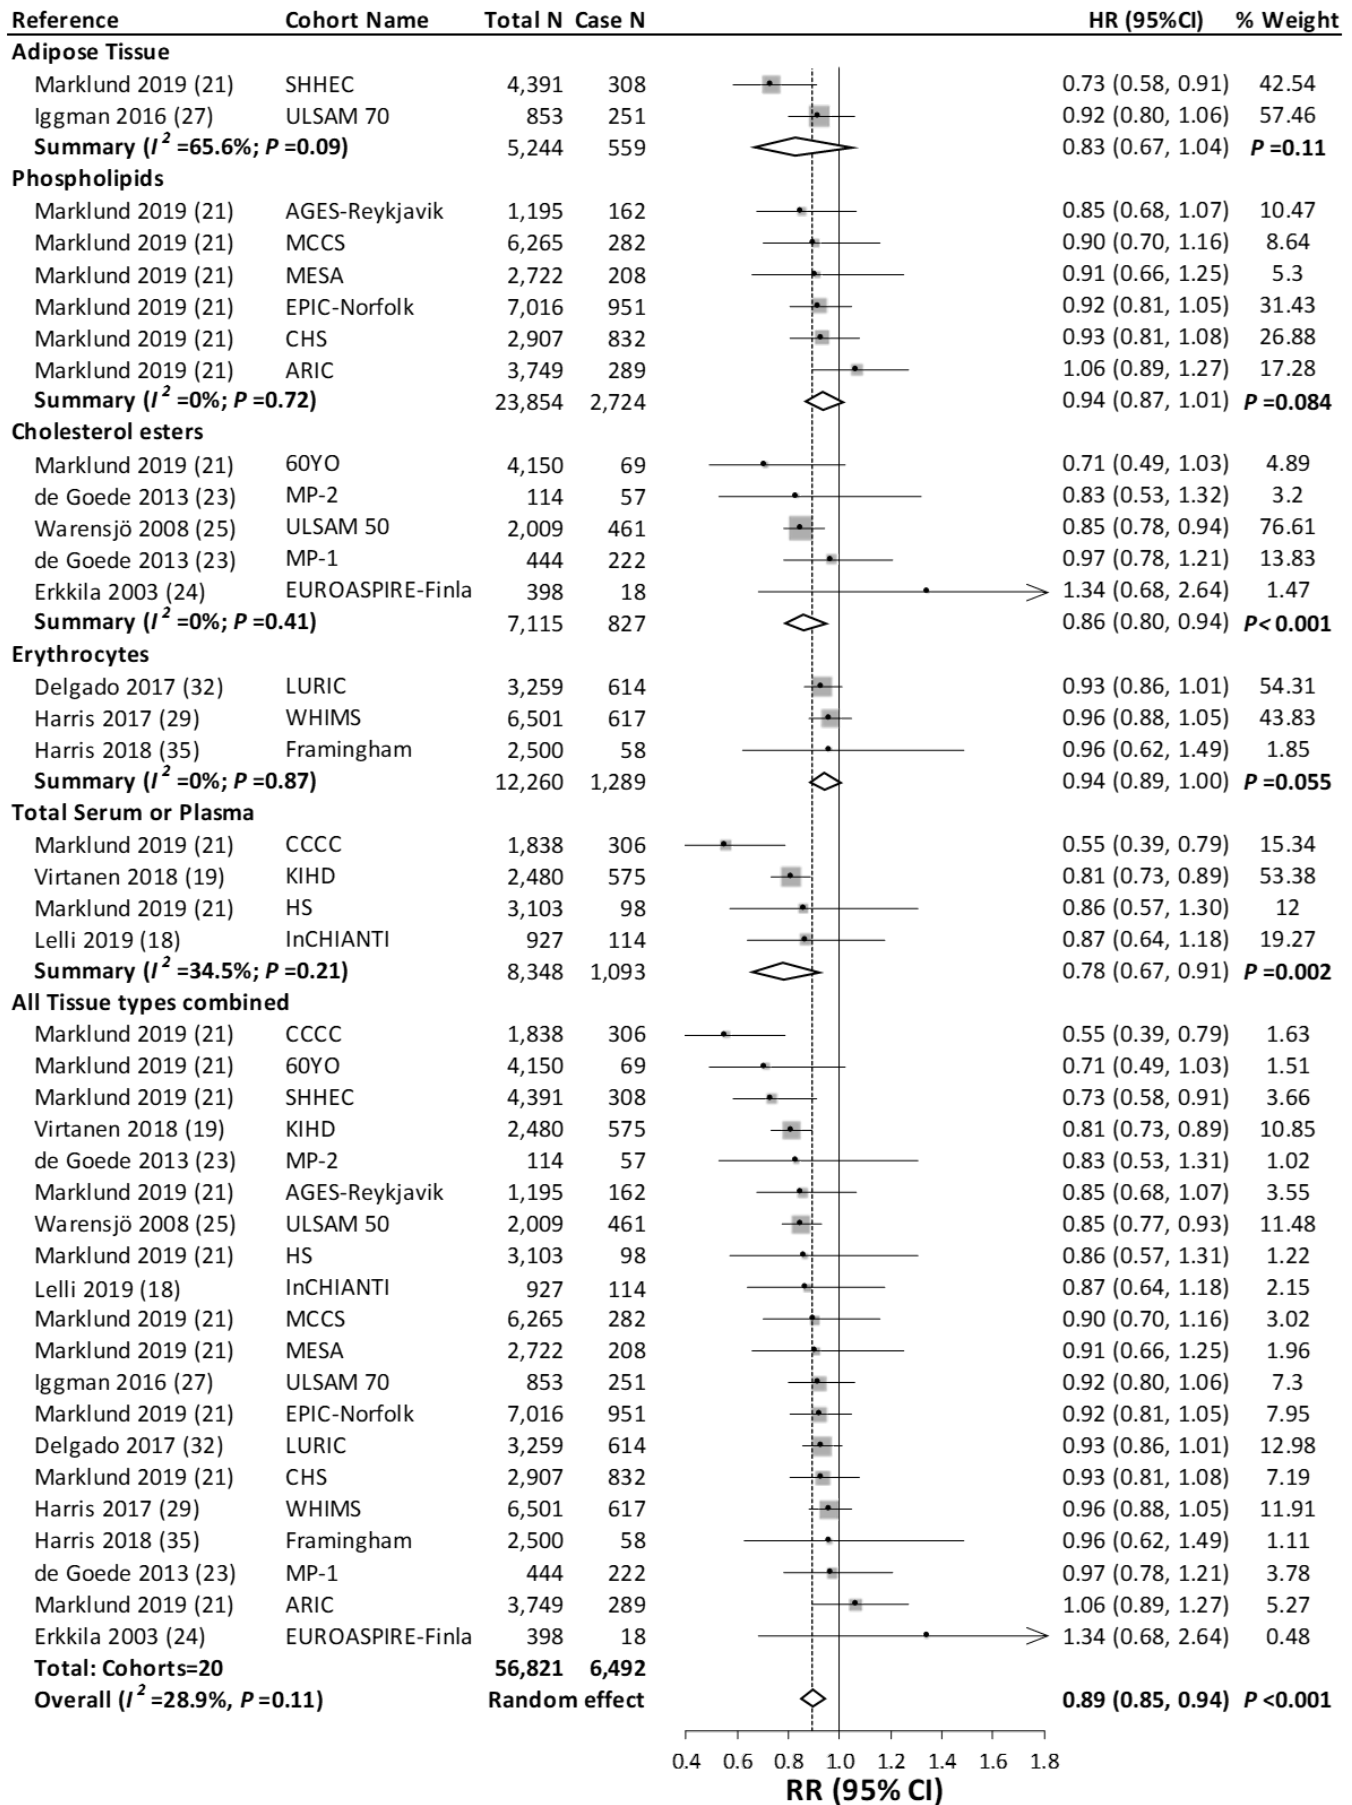

### C Cancer mortality

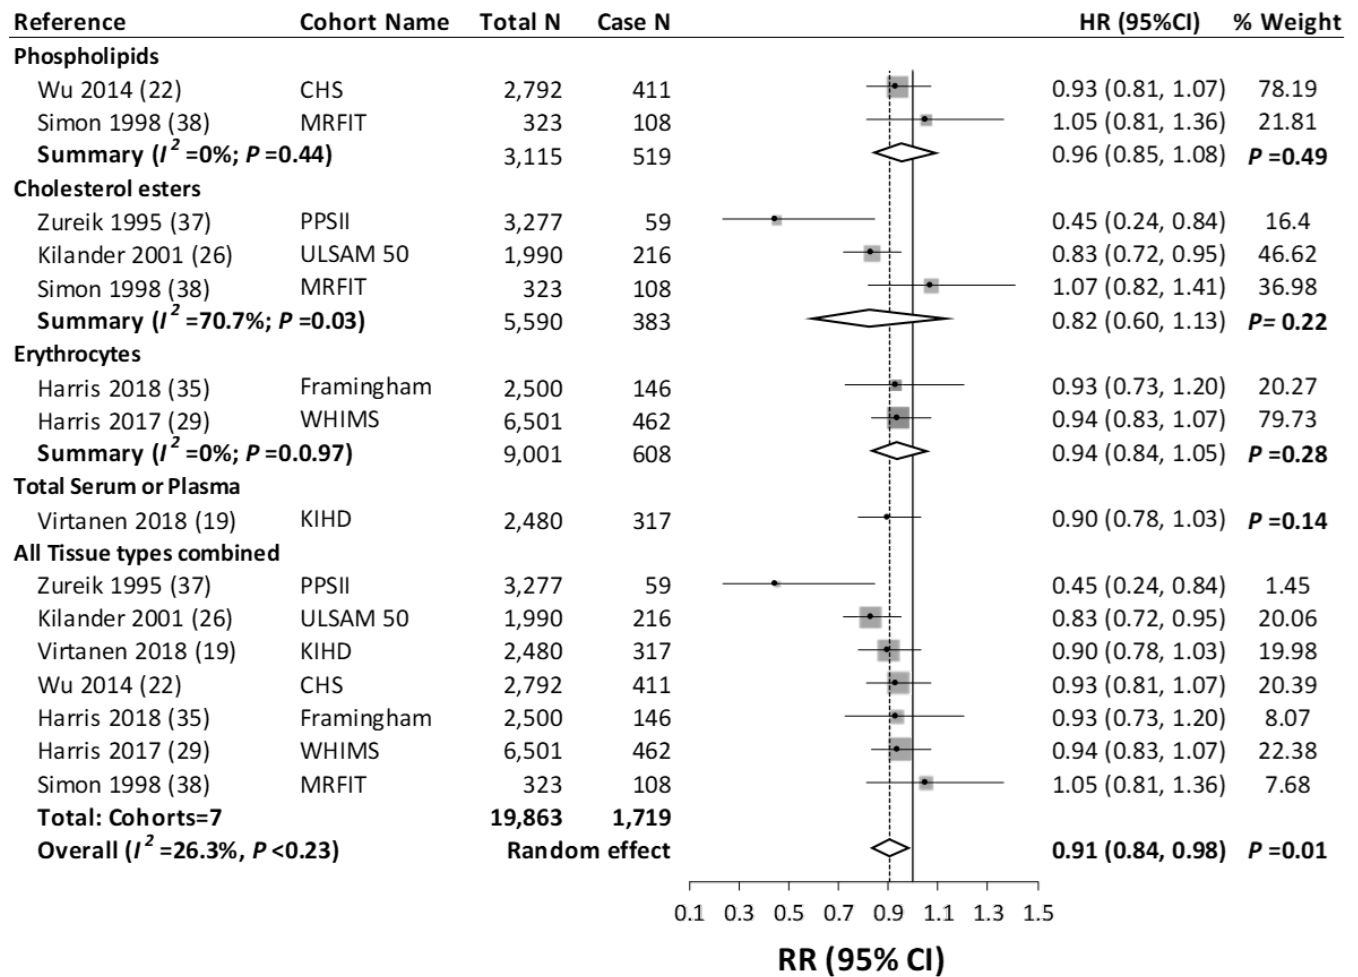

## Online Supplementary Material

**Supplement Figure 3** Baseline mean age (A) and dietary assessment frequency (B) are potential sources of heterogeneity for the association between dietary linoleic acid (LA) intake and total mortality; baseline mean age (C and F), sex (D and G), and study location (E) are potential sources of heterogeneity for associations between LA biomarkers with total and CVD mortality. Each circle denotes one study, with the size proportional to the weight of the study in meta-analyses. The x-axis is the scale for populational characteristics, and the y-axis shows the relative risks (comparing extreme quantiles for studies of dietary intakes; per standard deviation increment in LA biomarkers for studies of biomarkers).

**A** Dietary LA and CVD mortality, by baseline mean age

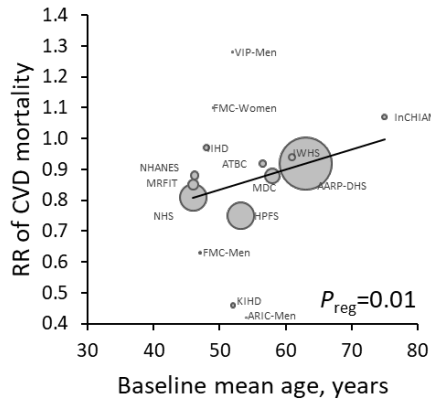

**B** Dietary LA and CVD mortality, by dietary assessment frequency

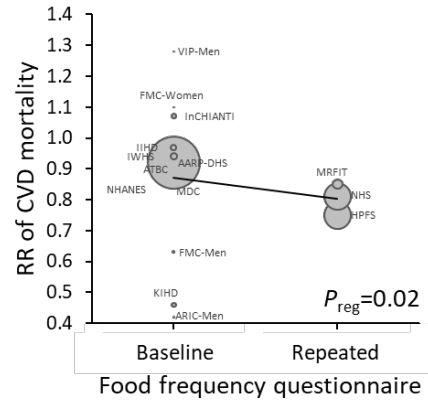

**C** LA biomarker and all-cause mortality, by baseline mean age

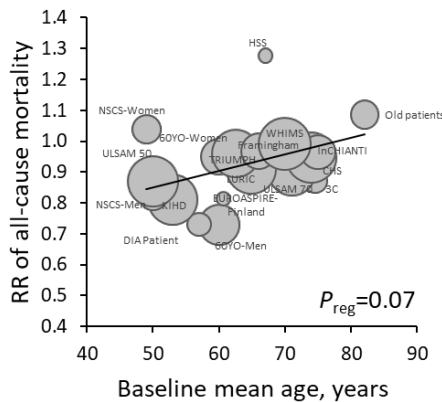

**D** LA biomarker and all-cause mortality, by percentage of male

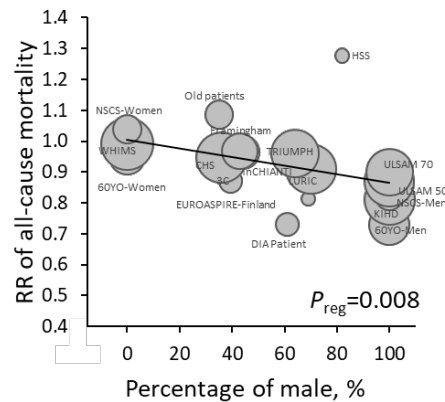

**E** LA biomarker and all-cause mortality, by study location

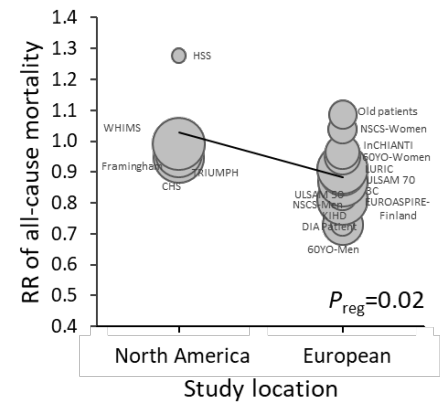

**F** LA biomarker and CVD mortality, by baseline mean age

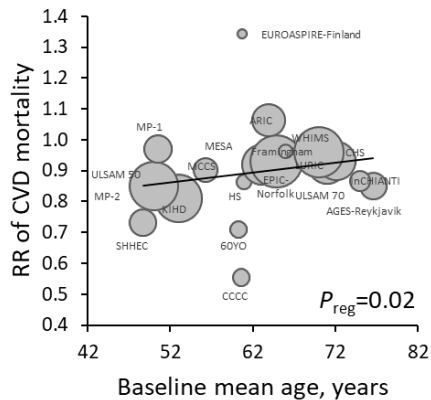

**G** LA biomarker and CVD mortality, by percentage of male

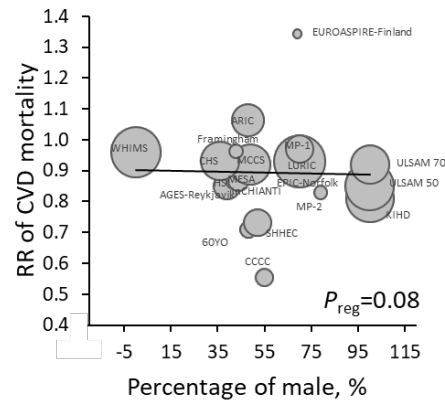

Online Supplementary Material

Supplement Figure 4 Funnel plots for meta-analysis of dietary linoleic acid intake with mortality from all-causes (A), CVD (B), and cancers (C), and for meta-analysis of biomarkers of linoleic acid with mortality from all-causes (D), CVD (E), and cancers (F). We used funnel plots and the Egger's tests to evaluate publication bias and small-study effects.

**A** Dietary LA vs. all-cause mortality

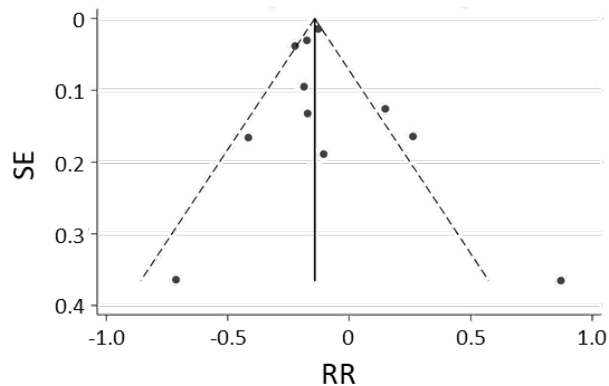

Egger's test for small-study effects:  $P = 0.73$

**B** Dietary LA vs. CVD mortality

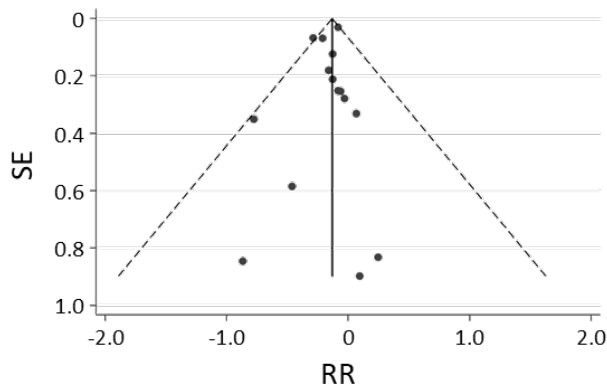

Egger's test for small-study effects:  $P = 0.33$

**C** Dietary LA vs. cancer mortality

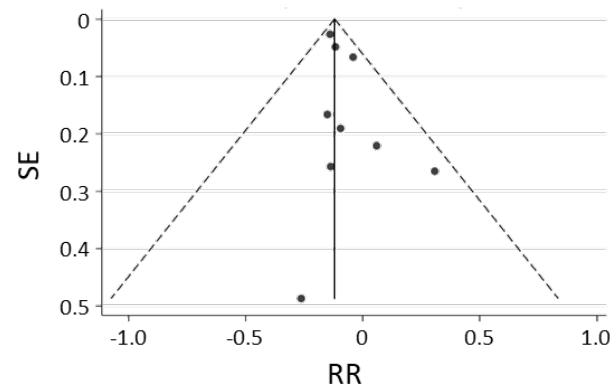

Egger's test for small-study effects:  $P = 0.16$

**D** Biomarker of LA vs. all-cause mortality

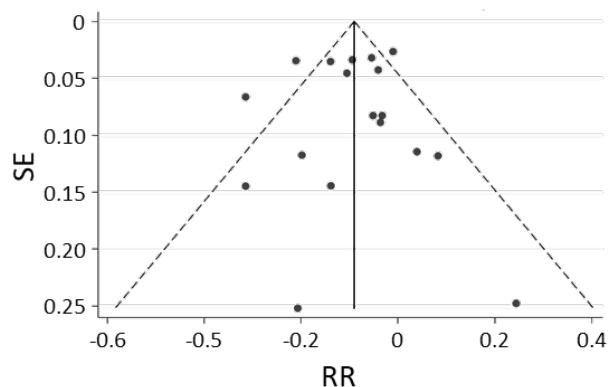

Egger's test for small-study effects:  $P = 0.81$

**E** Biomarker LA vs. CVD mortality

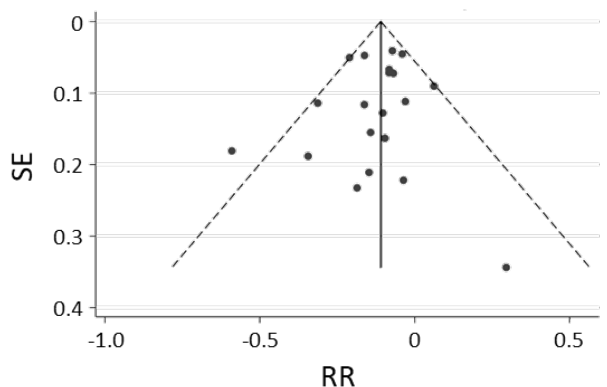

Egger's test for small-study effects:  $P = 0.49$

**F** Biomarker LA vs. cancer mortality

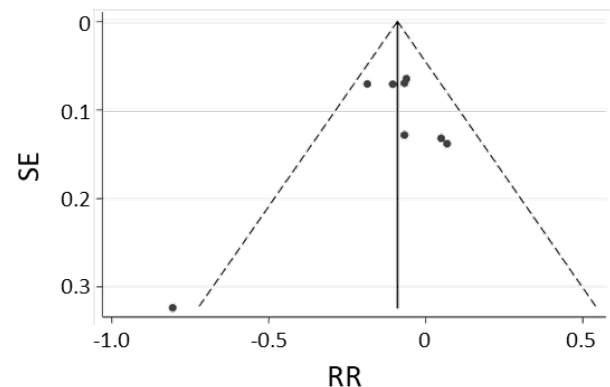

Egger's test for small-study effects:  $P = 0.64$

References

1. Dolecek TA, Granditis G. Dietary polyunsaturated fatty acids and mortality in the Multiple Risk Factor Intervention Trial (MRFIT). *World review of nutrition and dietetics* 1991;66:205-16.
2. Dolecek TA. Epidemiological evidence of relationships between dietary polyunsaturated fatty acids and mortality in the multiple risk factor intervention trial. *Proceedings of the Society for Experimental Biology and Medicine Society for Experimental Biology and Medicine (New York, NY)* 1992;200(2):177-82. doi: 10.3181/00379727-200-43413.
3. Fortes C, Forastiere F, Farchi S, Rapiti E, Pastori G, Perucci CA. Diet and overall survival in a cohort of very elderly people. *Epidemiology (Cambridge, Mass)* 2000;11(4):440-5. doi: 10.1097/00001648-200007000-00013.
4. McEligot AJ, Largent J, Ziogas A, Peel D, Anton-Culver H. Dietary fat, fiber, vegetable, and micronutrients are associated with overall survival in postmenopausal women diagnosed with breast cancer. *Nutrition and cancer* 2006;55(2):132-40. doi: 10.1207/s15327914nc5502\_3.
5. Wang DD, Li Y, Chiuve SE, Stampfer MJ, Manson JE, Rimm EB, Willett WC, Hu FB. Association of Specific Dietary Fats With Total and Cause-Specific Mortality. *JAMA Intern Med* 2016;176(8):1134-45. doi: 10.1001/jamainternmed.2016.2417.
6. Jiao J, Liu G, Shin HJ, Hu FB, Rimm EB, Rexrode KM, Manson JE, Zong G, Sun Q. Dietary fats and mortality among patients with type 2 diabetes: analysis in two population based cohort studies. *BMJ* 2019;366:l4009. doi: 10.1136/bmj.l4009.
7. Richman EL, Kenfield SA, Chavarro JE, Stampfer MJ, Giovannucci EL, Willett WC, Chan JM. Fat intake after diagnosis and risk of lethal prostate cancer and all-cause mortality. *JAMA Intern Med* 2013;173(14):1318-26. doi: 10.1001/jamainternmed.2013.6536.
8. Holmes MD, Hunter DJ, Colditz GA, Stampfer MJ, Hankinson SE, Speizer FE, Rosner B, Willett WC. Association of dietary intake of fat and fatty acids with risk of breast cancer. *JAMA* 1999;281(10):914-20. doi: 10.1001/jama.281.10.914.
9. Khankari NK, Bradshaw PT, Steck SE, He K, Olshan AF, Shen J, Ahn J, Chen Y, Ahsan H, Terry MB, et al. Dietary intake of fish, polyunsaturated fatty acids, and survival after breast cancer: A population-based follow-up study on Long Island, New York. *Cancer* 2015;121(13):2244-52. doi: 10.1002/cncr.29329.
10. Pietinen P, Ascherio A, Korhonen P, Hartman AM, Willett WC, Albanes D, Virtamo J. Intake of fatty acids and risk of coronary heart disease in a cohort of Finnish men. The Alpha-Tocopherol, Beta-Carotene Cancer Prevention Study. *Am J Epidemiol* 1997;145(10):876-87. doi: 10.1093/oxfordjournals.aje.a009047.
11. Farvid MS, Ding M, Pan A, Sun Q, Chiuve SE, Steffen LM, Willett WC, Hu FB. Dietary linoleic acid and risk of coronary heart disease: a systematic review and meta-analysis of prospective cohort studies. *Circulation* 2014;130(18):1568-78. doi: 10.1161/CIRCULATIONAHA.114.010236.
12. Goodwin PJ, Ennis M, Pritchard KI, Koo J, Trudeau ME, Hood N. Diet and breast cancer: evidence that extremes in diet are associated with poor survival. *J Clin Oncol* 2003;21(13):2500-7. doi: 10.1200/JCO.2003.06.121.
13. Jain M, Miller AB, To T. Premorbid diet and the prognosis of women with breast cancer. *J Natl Cancer Inst* 1994;86(18):1390-7. doi: 10.1093/jnci/86.18.1390.
14. Zhuang P, Zhang Y, He W, Chen X, Chen J, He L, Mao L, Wu F, Jiao J. Dietary Fats in Relation to Total and Cause-Specific Mortality in a Prospective Cohort of 521 120 Individuals With 16 Years of Follow-Up. *Circ Res* 2019;124(5):757-68. doi: 10.1161/CIRCRESAHA.118.314038.
15. Epstein MM, Kasperzyk JL, Mucci LA, Giovannucci E, Price A, Wolk A, Hakansson N, Fall K, Andersson SO, Andren O. Dietary fatty acid intake and prostate cancer survival in Orebro County, Sweden. *Am J Epidemiol* 2012;176(3):240-52. doi: 10.1093/aje/kwr520.
16. Zhuang P, Wang W, Wang J, Zhang Y, Jiao J. Polyunsaturated fatty acids intake, omega-6/omega-3 ratio and mortality: Findings from two independent nationwide cohorts. *Clin Nutr* 2019;38(2):848-55. doi: 10.1016/j.clnu.2018.02.019.
17. Laaksonen DE, Nyyssonen K, Niskanen L, Rissanen TH, Salonen JT. Prediction of cardiovascular mortality in middle-aged men by dietary and serum linoleic and polyunsaturated fatty acids. *Arch Intern Med* 2005;165(2):193-9. doi: 10.1001/archinte.165.2.193.

## Online Supplementary Material

18. Lelli D, Antonelli Incalzi R, Ferrucci L, Bandinelli S, Pedone C. Association between PUFA intake and serum concentration and mortality in older adults: A cohort study. *Clin Nutr* 2019. doi: 10.1016/j.clnu.2019.02.030.
19. Virtanen JK, Wu JHY, Voutilainen S, Mursu J, Tuomainen TP. Serum n-6 polyunsaturated fatty acids and risk of death: the Kuopio Ischaemic Heart Disease Risk Factor Study. *Am J Clin Nutr* 2018;107(3):427-35. doi: 10.1093/ajcn/nqx063.
20. Marklund M, Leander K, Vikstrom M, Laguzzi F, Gigante B, Sjogren P, Cederholm T, de Faire U, Hellenius ML, Riserus U. Polyunsaturated Fat Intake Estimated by Circulating Biomarkers and Risk of Cardiovascular Disease and All-Cause Mortality in a Population-Based Cohort of 60-Year-Old Men and Women. *Circulation* 2015;132(7):586-94. doi: 10.1161/CIRCULATIONAHA.115.015607.
21. Marklund M, Wu JHY, Imamura F, Del Gobbo LC, Fretts A, de Goede J, Shi P, Tintle N, Wennberg M, Aslibekyan S, et al. Biomarkers of Dietary Omega-6 Fatty Acids and Incident Cardiovascular Disease and Mortality. *Circulation* 2019;139(21):2422-36. doi: 10.1161/CIRCULATIONAHA.118.038908.
22. Wu JH, Lemaitre RN, King IB, Song X, Psaty BM, Siscovick DS, Mozaffarian D. Circulating omega-6 polyunsaturated fatty acids and total and cause-specific mortality: the Cardiovascular Health Study. *Circulation* 2014;130(15):1245-53. doi: 10.1161/CIRCULATIONAHA.114.011590.
23. de Goede J, Verschuren WM, Boer JM, Verberne LD, Kromhout D, Geleijnse JM. N-6 and N-3 fatty acid cholesteryl esters in relation to fatal CHD in a Dutch adult population: a nested case-control study and meta-analysis. *PloS one* 2013;8(5):e59408. doi: 10.1371/journal.pone.0059408.
24. Erkkila AT, Lehto S, Pyorala K, Uusitupa MI. n-3 Fatty acids and 5-y risks of death and cardiovascular disease events in patients with coronary artery disease. *Am J Clin Nutr* 2003;78(1):65-71. doi: 10.1093/ajcn/78.1.65.
25. Warensjo E, Sundstrom J, Vessby B, Cederholm T, Riserus U. Markers of dietary fat quality and fatty acid desaturation as predictors of total and cardiovascular mortality: a population-based prospective study. *Am J Clin Nutr* 2008;88(1):203-9. doi: 10.1093/ajcn/88.1.203.
26. Kilander L, Berglund L, Boberg M, Vessby B, Lithell H. Education, lifestyle factors and mortality from cardiovascular disease and cancer. A 25-year follow-up of Swedish 50-year-old men. *Int J Epidemiol* 2001;30(5):1119-26. doi: 10.1093/ije/30.5.1119.
27. Iggman D, Arnlov J, Cederholm T, Riserus U. Association of Adipose Tissue Fatty Acids With Cardiovascular and All-Cause Mortality in Elderly Men. *JAMA Cardiol* 2016;1(7):745-53. doi: 10.1001/jamacardio.2016.2259.
28. Harris WS, Kennedy KF, O'Keefe JH, Jr., Spertus JA. Red blood cell fatty acid levels improve GRACE score prediction of 2-yr mortality in patients with myocardial infarction. *International journal of cardiology* 2013;168(1):53-9. doi: 10.1016/j.ijcard.2012.09.076.
29. Harris WS, Luo J, Pottala JV, Espeland MA, Margolis KL, Manson JE, Wang L, Brasky TM, Robinson JG. Red blood cell polyunsaturated fatty acids and mortality in the Women's Health Initiative Memory Study. *Journal of clinical lipidology* 2017;11(1):250-9 e5. doi: 10.1016/j.jacl.2016.12.013.
30. Huang X, Stenvinkel P, Qureshi AR, Riserus U, Cederholm T, Barany P, Heimbürger O, Lindholm B, Carrero JJ. Essential polyunsaturated fatty acids, inflammation and mortality in dialysis patients. *Nephrology, dialysis, transplantation : official publication of the European Dialysis and Transplant Association - European Renal Association* 2012;27(9):3615-20. doi: 10.1093/ndt/gfs132.
31. Pottala JV, Garg S, Cohen BE, Whooley MA, Harris WS. Blood eicosapentaenoic and docosahexaenoic acids predict all-cause mortality in patients with stable coronary heart disease: the Heart and Soul study. *Circulation Cardiovascular quality and outcomes* 2010;3(4):406-12. doi: 10.1161/CIRCOUTCOMES.109.896159.
32. Delgado GE, Marz W, Lorkowski S, von Schacky C, Kleber ME. Omega-6 fatty acids: Opposing associations with risk-The Ludwigshafen Risk and Cardiovascular Health Study. *Journal of clinical lipidology* 2017;11(4):1082-90 e14. doi: 10.1016/j.jacl.2017.05.003.
33. Lindberg M, Saltvedt I, Sletvold O, Bjerve KS. Long-chain n-3 fatty acids and mortality in elderly patients. *Am J Clin Nutr* 2008;88(3):722-9. doi: 10.1093/ajcn/88.3.722.

### Online Supplementary Material

34. Miura K, Hughes MCB, Ungerer JP, Green AC. Plasma eicosapentaenoic acid is negatively associated with all-cause mortality among men and women in a population-based prospective study. *Nutrition research* (New York, NY) 2016;36(11):1202-9. doi: 10.1016/j.nutres.2016.09.006.
35. Harris WS, Tintle NL, Ramachandran VS. Erythrocyte n-6 Fatty Acids and Risk for Cardiovascular Outcomes and Total Mortality in the Framingham Heart Study. *Nutrients* 2018;10(12). doi: 10.3390/nu10122012.
36. Satizabal CL, Samieri C, Davis-Plourde KL, Voetsch B, Aparicio HJ, Pase MP, Romero JR, Helmer C, Vasani RS, Kase CS, et al. APOE and the Association of Fatty Acids With the Risk of Stroke, Coronary Heart Disease, and Mortality. *Stroke* 2018;49(12):2822-9. doi: 10.1161/STROKEAHA.118.022132.
37. Zureik M, Ducimetiere P, Warnet JM, Orssaud G. Fatty acid proportions in cholesterol esters and risk of premature death from cancer in middle aged French men. *BMJ* 1995;311(7015):1251-4. doi: 10.1136/bmj.311.7015.1251.
38. Simon JA, Fong J, Bernert JT, Jr., Browner WS. Serum fatty acids and the risk of fatal cancer. MRFIT Research Group. Multiple Risk Factor Intervention Trial. *Am J Epidemiol* 1998;148(9):854-8. doi: 10.1093/oxfordjournals.aje.a009710.
